# Supplementary material for: Reducing Cardiovascular Maternal Mortality by Extending Medicaid for Postpartum Women
Source: PubMed Central journal article supplement — J Am Heart Assoc. 2021 Jul 29;10(15):e022040. doi: 10.1161/JAHA.121.022040 (PMC8475675; doi:10.1161/jaha.121.022040), 2021-07-29
Supplement: JAH3-10-e022040-s001.pdf [file JAH3-10-e022040-s001.pdf]

# **SUPPLEMENTAL MATERIAL**

**Table S1. Current Medicaid Eligibility for Pregnant Women and Parents and Pending Legislation Extending Postpartum Coverage.**

|                             | <b>Medicaid and CHIP Income Eligibility Limits for Pregnant Women (% FPL)</b> | <b>Medicaid Income Eligibility Limits for Parents (% FPL)</b> | <b>Medicaid Expansion Status</b> | <b>Legislation Extending Postpartum Coverage</b> | <b>Legislation Summary</b>                                                                                                                                                                                                                                         |
|-----------------------------|-------------------------------------------------------------------------------|---------------------------------------------------------------|----------------------------------|--------------------------------------------------|--------------------------------------------------------------------------------------------------------------------------------------------------------------------------------------------------------------------------------------------------------------------|
| <b>Alabama</b>              | 146%                                                                          | 18%                                                           | Not Adopted                      | Pending                                          | Pending legislation to extend postpartum Medicaid coverage to one year.                                                                                                                                                                                            |
| <b>Alaska</b>               | 205%                                                                          | 138%                                                          | Adopted                          | No                                               |                                                                                                                                                                                                                                                                    |
| <b>Arizona</b>              | 161%                                                                          | 138%                                                          | Adopted                          | No                                               |                                                                                                                                                                                                                                                                    |
| <b>Arkansas</b>             | 214%                                                                          | 138%                                                          | Adopted                          | No                                               |                                                                                                                                                                                                                                                                    |
| <b>California</b>           | 322%                                                                          | 138%                                                          | Adopted                          | Implementing (Limited Coverage Extension)        | Passed legislation to extend postpartum Medi-Cal eligibility to one year for women diagnosed with a maternal mental health condition. The increased funding for postpartum care will be suspended after Dec. 31, 2021 unless it is funded by general fund revenue. |
| <b>Colorado</b>             | 265%                                                                          | 138%                                                          | Adopted                          | No                                               |                                                                                                                                                                                                                                                                    |
| <b>Connecticut</b>          | 263%                                                                          | 160%                                                          | Adopted                          | No                                               |                                                                                                                                                                                                                                                                    |
| <b>Delaware</b>             | 217%                                                                          | 138%                                                          | Adopted                          | Pending                                          | Passed a resolution to study the extension of postpartum Medicaid coverage to one year.                                                                                                                                                                            |
| <b>District of Columbia</b> | 324%                                                                          | 221%                                                          | Adopted                          | Pending                                          | Pending legislation to extend postpartum Medicaid coverage to one year.                                                                                                                                                                                            |
| <b>Florida</b>              | 196%                                                                          | 31%                                                           | Not Adopted                      | No                                               |                                                                                                                                                                                                                                                                    |
| <b>Georgia</b>              | 225%                                                                          | 35%                                                           | Not Adopted                      | Pending                                          | Passed legislation to extend postpartum Medicaid coverage to six months, but requires funding from a Medicaid state plan amendment or waiver request to the US Department of Health and Human Services.                                                            |
| <b>Hawaii</b>               | 196%                                                                          | 138%                                                          | Adopted                          | Pending                                          | Pending legislation to extend postpartum Medicaid coverage to one year.                                                                                                                                                                                            |
| <b>Idaho</b>                | 138%                                                                          | 138%                                                          | Adopted                          | No                                               |                                                                                                                                                                                                                                                                    |
| <b>Illinois</b>             | 213%                                                                          | 138%                                                          | Adopted                          | Pending                                          | Pending CMS waiver to extend postpartum Medicaid coverage to one year for women earning up to 200% of the FPL.                                                                                                                                                     |

|                       |      |      |                                 |         |                                                                                                                                                                                                                                                                                                                                                                                                                                                                |
|-----------------------|------|------|---------------------------------|---------|----------------------------------------------------------------------------------------------------------------------------------------------------------------------------------------------------------------------------------------------------------------------------------------------------------------------------------------------------------------------------------------------------------------------------------------------------------------|
| <b>Indiana</b>        | 218% | 138% | Adopted                         | Pending | Pending CMS waiver to extend postpartum coverage to 365 days for mothers with opioid use disorder.                                                                                                                                                                                                                                                                                                                                                             |
| <b>Iowa</b>           | 380% | 138% | Adopted                         | Pending | Pending legislation to extend postpartum Medicaid coverage to one year.                                                                                                                                                                                                                                                                                                                                                                                        |
| <b>Kansas</b>         | 171% | 38%  | Not Adopted                     | No      |                                                                                                                                                                                                                                                                                                                                                                                                                                                                |
| <b>Kentucky</b>       | 200% | 138% | Adopted                         | No      |                                                                                                                                                                                                                                                                                                                                                                                                                                                                |
| <b>Louisiana</b>      | 214% | 138% | Adopted                         | No      |                                                                                                                                                                                                                                                                                                                                                                                                                                                                |
| <b>Maine</b>          | 214% | 138% | Adopted                         | No      | Pending legislation to extend postpartum MaineCare coverage to six months.                                                                                                                                                                                                                                                                                                                                                                                     |
| <b>Maryland</b>       | 264% | 138% | Adopted                         | No      |                                                                                                                                                                                                                                                                                                                                                                                                                                                                |
| <b>Massachusetts</b>  | 205% | 138% | Adopted                         | No      |                                                                                                                                                                                                                                                                                                                                                                                                                                                                |
| <b>Michigan</b>       | 200% | 138% | Adopted                         | Pending | Pending FY 2021 budget appropriations to extend postpartum Medicaid coverage to one year.                                                                                                                                                                                                                                                                                                                                                                      |
| <b>Minnesota</b>      | 283% | 138% | Adopted                         | Pending |                                                                                                                                                                                                                                                                                                                                                                                                                                                                |
| <b>Mississippi</b>    | 199% | 26%  | Not Adopted                     | No      | Failed to pass legislation to extend postpartum Medicaid coverage to one year.                                                                                                                                                                                                                                                                                                                                                                                 |
| <b>Missouri</b>       | 305% | 21%  | Adopted but not yet implemented | Pending | Pending CMS waiver to extend MO HealthNet eligibility up to 12 additional months for pregnant women receiving substance abuse treatment within 60 days of giving birth. Pending legislation to extend postpartum coverage to one year for mothers in the Show Me Healthy Babies Program. Passed legislation to extend MO HealthNet benefits for mental health services up to 12 additional months for women diagnosed with a maternal mental health condition. |
| <b>Montana</b>        | 162% | 138% | Adopted                         | No      |                                                                                                                                                                                                                                                                                                                                                                                                                                                                |
| <b>Nebraska</b>       | 202% | 138% | Adopted                         | No      |                                                                                                                                                                                                                                                                                                                                                                                                                                                                |
| <b>Nevada</b>         | 165% | 138% | Adopted                         | No      |                                                                                                                                                                                                                                                                                                                                                                                                                                                                |
| <b>New Hampshire</b>  | 201% | 138% | Adopted                         | No      |                                                                                                                                                                                                                                                                                                                                                                                                                                                                |
| <b>New Jersey</b>     | 205% | 138% | Adopted                         | Pending | Pending CMS waiver to extend postpartum NJ FamilyCare coverage to 180 days.                                                                                                                                                                                                                                                                                                                                                                                    |
| <b>New Mexico</b>     | 255% | 138% | Adopted                         | No      |                                                                                                                                                                                                                                                                                                                                                                                                                                                                |
| <b>New York</b>       | 223% | 138% | Adopted                         | Pending | Pending legislation to extend postpartum Medicaid coverage to one year.                                                                                                                                                                                                                                                                                                                                                                                        |
| <b>North Carolina</b> | 201% | 41%  | Not Adopted                     | No      |                                                                                                                                                                                                                                                                                                                                                                                                                                                                |
| <b>North Dakota</b>   | 162% | 138% | Adopted                         | No      |                                                                                                                                                                                                                                                                                                                                                                                                                                                                |
| <b>Ohio</b>           | 205% | 138% | Adopted                         | No      |                                                                                                                                                                                                                                                                                                                                                                                                                                                                |

|                       |      |      |                                  |                                           |                                                                                                                                                                                                                                           |
|-----------------------|------|------|----------------------------------|-------------------------------------------|-------------------------------------------------------------------------------------------------------------------------------------------------------------------------------------------------------------------------------------------|
| <b>Oklahoma</b>       | 210% | 41%  | Adopted, but not yet implemented | No                                        |                                                                                                                                                                                                                                           |
| <b>Oregon</b>         | 190% | 138% | Adopted                          | No                                        |                                                                                                                                                                                                                                           |
| <b>Pennsylvania</b>   | 220% | 138% | Adopted                          | Pending                                   | Pending legislation to apply for CMS waiver to extend postpartum Medicaid coverage up to an additional 10 months following the birth of the child.                                                                                        |
| <b>Rhode Island</b>   | 258% | 138% | Adopted                          | No                                        |                                                                                                                                                                                                                                           |
| <b>South Carolina</b> | 199% | 67%  | Not Adopted                      | Implementing (Limited Coverage Extension) | Passed limited CMS waiver opening up 1000 spots to prioritize Medicaid coverage for pregnant women and parents of foster children receiving substance abuse treatment.                                                                    |
| <b>South Dakota</b>   | 138% | 48%  | Not Adopted                      | No                                        |                                                                                                                                                                                                                                           |
| <b>Tennessee</b>      | 255% | 94%  | Not Adopted                      | Pending                                   | Failed to pass legislation to extend postpartum TennCare coverage to one year for those with incomes up to 195% of the FPL.                                                                                                               |
| <b>Texas</b>          | 207% | 17%  | Not Adopted                      | Implementing (Limited Coverage Extension) | Passed legislation allowing for extended postpartum coverage to one year for eligible women part of Health Texas Women, using state-only funding. Pending legislation to extend postpartum Medicaid coverage to one year for all mothers. |
| <b>Utah</b>           | 144% | 138% | Adopted                          | No                                        |                                                                                                                                                                                                                                           |
| <b>Vermont</b>        | 213% | 138% | Adopted                          | No                                        |                                                                                                                                                                                                                                           |
| <b>Virginia</b>       | 205% | 138% | Adopted                          | Pending                                   | Passed budget bill to extend postpartum Medicaid coverage to one year for women earning up to 205% of the FPL, but there is currently a freeze on new spending in the state budget.                                                       |
| <b>Washington</b>     | 198% | 138% | Adopted                          | No                                        | Failed to pass legislation to extend postpartum Medicaid coverage to one year for women earning up to 193% of the FPL.                                                                                                                    |
| <b>West Virginia</b>  | 305% | 138% | Adopted                          | Pending                                   | Pending legislation to extend postpartum Medicaid coverage to one year.                                                                                                                                                                   |
| <b>Wisconsin</b>      | 306% | 100% | Not Adopted                      | No                                        | Failed to pass legislation to extend postpartum BadgerCare Plus coverage to one year for women who begin receiving substance abuse-related health services under BadgerCare Plus while pregnant.                                          |
| <b>Wyoming</b>        | 159% | 53%  | Not Adopted                      | No                                        |                                                                                                                                                                                                                                           |
